# Supplementary material
Source: PubMed Central journal article supplement (PMC7093140)
Supplement: IAI.00908-19-s0006.pdf [file IAI.00908-19-s0006.pdf]

1 **Supplemental Figure Legends:**

2

3 **Figure S1. Duration of protective effect seen in immunized mice.**

4 Eight week old male C57BL/6 mice were immunized by infection with  $5 \times 10^3$  GFP-  
5 DDDHA. At 4, 6, 7, 9, 12 and 15 months post immunization, mice were challenged with  
6 a lethal dose ( $5 \times 10^5$ ) of WT Tulahuen *T. cruzi*. Age match non-immunized mice were  
7 infected with the same dose as control animals. As shown, immunized mice had  
8 essentially no mortality when challenged even at 15 months post immunization, while  
9 non-immunized mice all died rapidly from the same WT infection.

10

11 **Figure S2. In the absence of TMP-lactate GFP-DDDHA immunization provides**  
12 **cross protection and protection against challenge infection.**

13

14 **A.** Eight week old male C3H mice were immunized with  $5 \times 10^3$  GFP-DDDHA Tulahuen  
15 strain for 42 days without TMP-lactate treatment. When challenged with  $5 \times 10^5$  Brazil  
16 strain (WT), these immunized mice did not develop parasitemia. In contrast, mice that  
17 had not been immunized mice had a significant parasitemia (top panel). All of the  
18 immunized mice survived the challenge infection, while all of the non-immunized mice  
19 died during the challenge infection (bottom panel) (n=5).

20 **B.** Eight week old male C57BL/6 mice were immunized with  $5 \times 10^3$  GFP-DDDHA  
21 Tulahuen strain for 42 days without TMP-lactate treatment and then challenged with

22  $5 \times 10^5$  Brazil strain (WT). Immunized mice had almost no parasitemia, while non-  
23 immunized mice had a significant higher parasitemia (top panel). All of the immunized  
24 mice survived the challenge infection, while 40% of the non-immunized mice died from  
25 the challenge infection (bottom panel) (n=5).

26 **C.** Eight week old male C57BL/6 were immunized with  $5 \times 10^3$  GFP-DDDHA Tulahuen  
27 strain for 42 days without TMP-lactate treatment and then challenged with  $5 \times 10^5$   
28 Tulahuen strain (WT). Immunized mice did not develop parasitemia while non-  
29 immunized mice had a high parasitemia (top panel). All of the immunized mice survived  
30 the challenge infection, while all of the non-immunized mice died during the acute phase  
31 of the challenge infection (bottom panel) (n=5).

32

33 Data in A, B and C were analyzed by using an unpaired two-tailed *t* test.

34 \* $P < 0.05$ , \*\* $P < 0.01$ , \*\*\* $P < 0.001$

35

36 **Figure S3. Immunization with the GFP-DDDHA strain induces early and strong**  
37 **recall responses in monocytes and neutrophils.**

38 Immunized C57BL/6 mice were re-infected with half million of WT Tulahuen parasites at  
39 12 and 24 hours of post infection. Splenocytes were analyzed by FACS and gated on  
40 monocytes and neutrophils. Monocytes from immunized mice have early strong  
41 responses by expressing CD86, CD40, MHCII, iNOS, TNF- $\alpha$  and IL-12 as compared to  
42 that of non-immunized mice. Neutrophils from immunized mice expressed higher INF- $\alpha$   
43 than that of non-immunized mice.

44 Data are representative of three separate experiments. All three experiments produced  
45 similar results.

46

47 **Figure S4. Immunization with the GFP-DDDHA strain induces early and strong**  
48 **recall responses in dendritic cells.**

49 Immunized C57BL/6 mice were re-infected with half million of WT Tulahuen parasites at  
50 12 and 24 hours of post infection. Splenocytes were analyzed by FACS and gated on  
51 dendritic cells. Dendritic cells from immunized mice have early strong responses by  
52 expressing CD86, CD40, MHCII, iNOS, TNF- $\alpha$  as compared to that of non-immunized  
53 mice.

54 Data are representative of three separate experiments. All three experiments produced  
55 similar results.

56

57 **Figure S5. Immunization with the GFP-DDDHA strain induces early and strong**  
58 **recall responses in CD4<sup>+</sup> and CD8<sup>+</sup> T cells.**

59 Immunized C57BL/6 mice were re-infected with half million of WT Tulahuen parasites at  
60 12 and 24 hours of post infection. Splenocytes were analyzed by FACS and gated on  
61 CD4<sup>+</sup> and CD8<sup>+</sup> T cells. A subset of effector memory T cells ( CD44<sup>+</sup> CD62L<sup>-</sup> CD4<sup>+</sup> and  
62 CD44<sup>+</sup> CD62L<sup>-</sup> CD8<sup>+</sup>) from immunized mice quickly and strongly expressed granzyme B  
63 compared to that of non-immunized mice. CD4<sup>+</sup> and CD8<sup>+</sup> T cells from immunized mice  
64 also had early expression of IFN-  $\gamma$ .

65 Data are representative of three separate experiments. All three experiments produced  
66 similar results.

67

68

69

70
