# Supplementary material
Source: PubMed Central journal article supplement (PMC7093140)

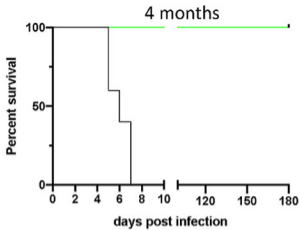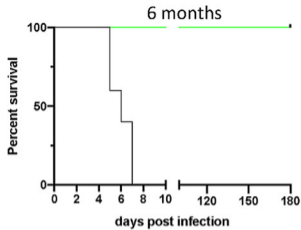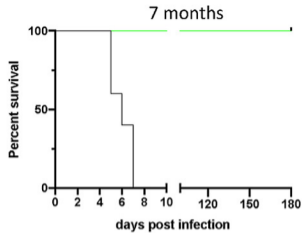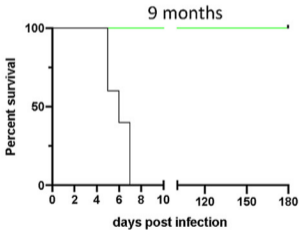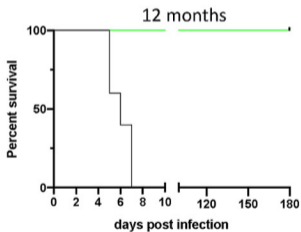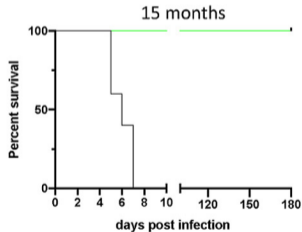

 Immunized     Non-Immunized

Supplement: IAI.00908-19-s0001.pdf [file IAI.00908-19-s0001.pdf]

**A**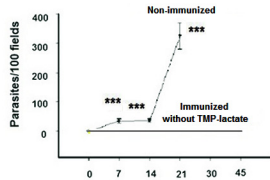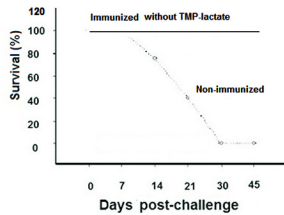**B**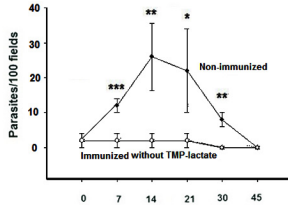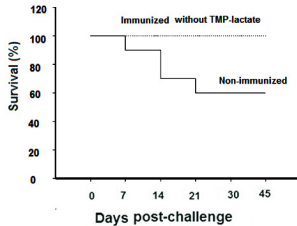**C**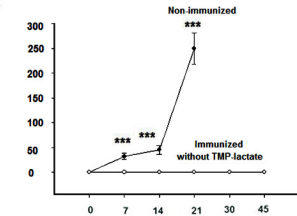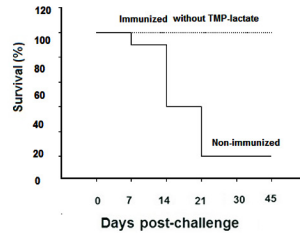

Supplement: IAI.00908-19-s0002.pdf [file IAI.00908-19-s0002.pdf]

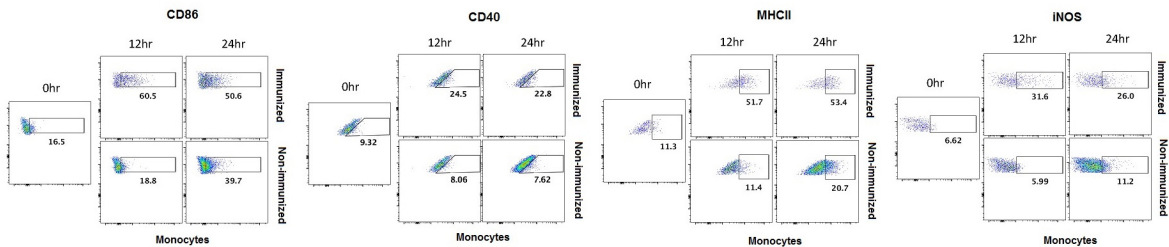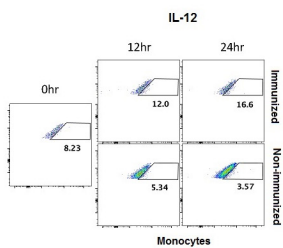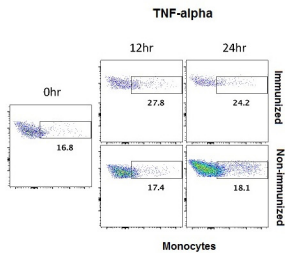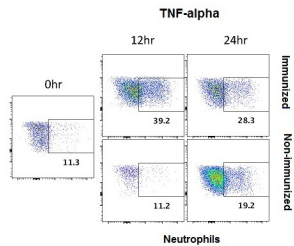

Supplement: IAI.00908-19-s0003.pdf [file IAI.00908-19-s0003.pdf]

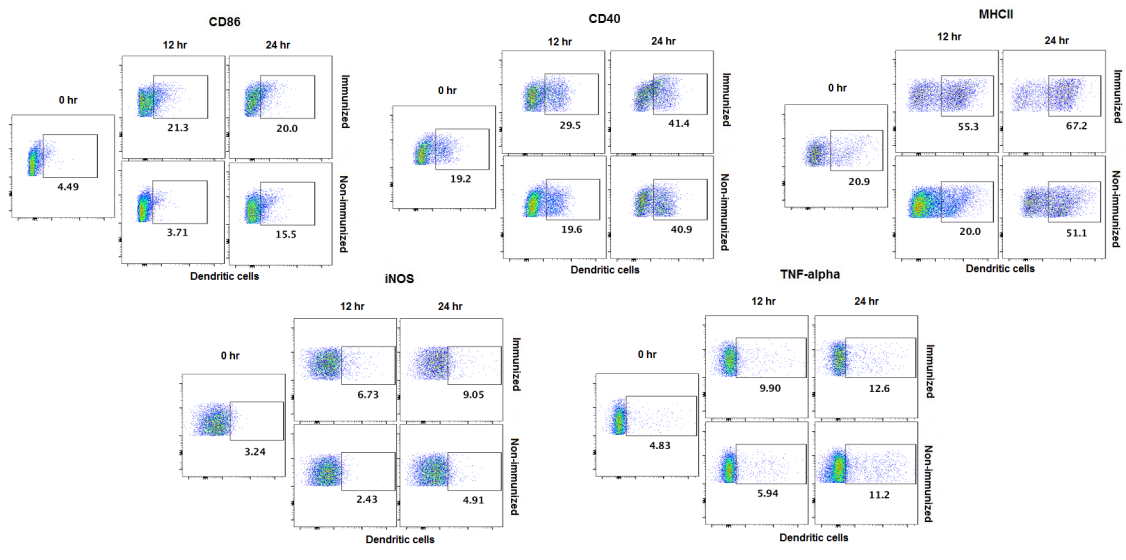

Supplement: IAI.00908-19-s0004.pdf [file IAI.00908-19-s0004.pdf]

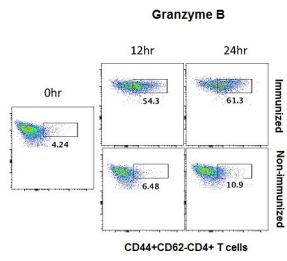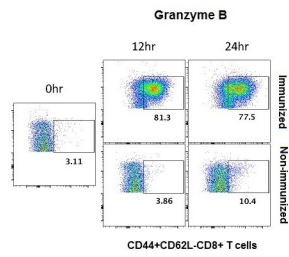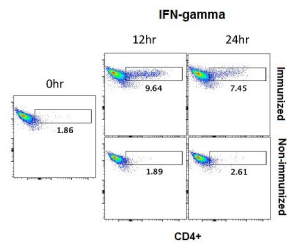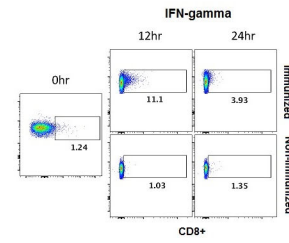

Supplement: IAI.00908-19-s0005.pdf [file IAI.00908-19-s0005.pdf]
